# Supplementary material for: Catalytic conversion of ferrous carbonate to higher hydrocarbons under mild conditions and its application in transformation of CO2to liquid fuels
Source: Royal Society of Chemistry journal article supplement (doi:10.1039/c9se00612e), 2019-10-17
Supplement: c9se00612e1.pdf [file c9se00612e1.pdf]

## **Supplementary Information**

### **Catalytic Conversion of Ferrous Carbonate to Higher Hydrocarbons under Mild Conditions and Its Application in Transformation of CO<sub>2</sub> to Liquid Fuels**

Yulv Yu, † Jin Huang, † Yuan Wang\*

## Experimental section

### *Materials*

Hydrogen (99.999%) and carbon dioxide (99.999%) were supplied by Beijing Haikeyuanchang Utility Gas Co., Ltd.  $\text{RuCl}_3 \cdot n\text{H}_2\text{O}$ ,  $\text{H}_2\text{PtCl}_6 \cdot 6\text{H}_2\text{O}$  and  $\text{FeCl}_3 \cdot 6\text{H}_2\text{O}$  were purchased from Sinopharm Chemical Reagent Co., Ltd.  $\text{TiO}_2$  (AR) was purchased from Xilong Scientific Co., Ltd.  $^{13}\text{C}$  labeled carbon dioxide (purity: 99%) was purchased from Sigma-Aldrich Corporation. Cyclohexane of GC grade was purchased from ANPEL Laboratory Technologies (Shanghai) Incorporation. Other reagents used in this work were of analytical grade.

### *Preparation of catalysts.*

A glycol solution of NaOH (50 ml, 0.26 M) was added dropwise into a glycol solution of  $\text{H}_2\text{PtCl}_6 \cdot 6\text{H}_2\text{O}$  (50 ml, 20 g/L) under stirring. The mixture was stirred for 30 minutes and subsequently heated at 160 °C by microwave for 5 minutes under nitrogen atmosphere. A colloidal solution of Pt nanoclusters with an average diameter of 1.3 nm (Pt: 3.7 g/L) was obtained <sup>[1]</sup>. A colloidal solution of Ru nanoclusters (Ru: 3.8 g/L) was prepared using a similar method.

$\text{FeCl}_3 \cdot 6\text{H}_2\text{O}$  (50g) and urea (50g) were dissolved in 300 ml of glycol. The obtained solution was heated till an orange precipitate was generated. After being washed with water and ethanol, the precipitate was dried by an infrared lamp. The resulting yellow powder was calcined at 400 °C under nitrogen atmosphere for 3 hours to generate a  $\text{Fe}_3\text{O}_4$  support as a black powder <sup>[2]</sup>.

20 ml of hydrochloric acid (8 M) was added into 5.5 ml of the prepared colloid solution of Pt nanoclusters to get a precipitate of Pt nanoclusters that was separated by centrifugation. The obtained Pt nanoclusters were dispersed in 10 ml of acetone to obtain a stable colloidal solution, which was then added dropwise into a suspension of the  $\text{Fe}_3\text{O}_4$  support (1.0 g) in 100 ml of acetone. The mixture was stirred for 24 hours, then the solid product in the mixture was filtered, washed

with acetone three times, and dried in an oven under vacuum at 60 °C for 3 hours to get a  $\text{Fe}_3\text{O}_4$  supported Pt nanoclusters ( $\text{Pt}/\text{Fe}_3\text{O}_4$ ) precursor. The obtained  $\text{Pt}/\text{Fe}_3\text{O}_4$  precursor was dispersed in an aqueous solution of  $\text{NaHCO}_3$  (100 ml, 0.1 M), and 5.2 ml of aqueous solution of  $\text{RuCl}_3 \cdot x\text{H}_2\text{O}$  (20 g/L) was added dropwise into the suspension. After the mixture was stirred for 24 hours, the solid product in the mixture was filtered, washed with water three times, and then dried at 60 °C for 3 hours to get a precursor composed of nanoparticles of Pt and  $\text{RuO}_x \cdot n\text{H}_2\text{O}$  on the  $\text{Fe}_3\text{O}_4$  support. The obtained precursor was reduced with 2.8 MPa of hydrogen in water under stirring at 150 °C for 2 hours, and then the solid was separated by centrifugation and dried at 60 °C for 3 hours to obtain the  $\text{Fe}_3\text{O}_4$  supported Pt and Ru nanoparticles ( $\text{Ru-Pt}/\text{Fe}_3\text{O}_4$ ). A catalyst composed of Ru and Pt nanoparticles ( $\text{Ru-Pt}/\text{TiO}_2$ ) on  $\text{TiO}_2$  was prepared using a similar method.

$\text{Ru-Pt}/\text{Fe}_3\text{O}_4$  was treated with a 4.3 MPa of gas mixture of  $\text{CO}_2$  and  $\text{H}_2$  with a molar ratio of 1:3 at 160 °C in a mixture of cyclohexane and water for 24 hours to obtain  $\text{Ru-Pt}/\text{FeCO}_3$ . The obtained solid was washed with cyclohexane and water three times, respectively, and separated from liquid by centrifugation. No hydrocarbon except cyclohexane was detected in the supernatant of the third separation.  $\text{Ru-Pt}/\text{Fe}^{13}\text{CO}_3$  was prepared by treating  $\text{Ru-Pt}/\text{Fe}_3\text{O}_4$  with  $^{13}\text{CO}_2$  and  $\text{H}_2$  using the same method.

A colloidal solution of PtRu alloy ( $\text{Ru}/\text{Pt}=2.5$ ) nanoclusters was prepared using previously reported method [3]. 18 ml of glycol solution of  $\text{NaOH}$  (0.26 M) was added into 7.8 ml of glycol solution of  $\text{H}_2\text{PtCl}_6 \cdot 6\text{H}_2\text{O}$  (20g/L) and 10 ml of glycol solution of  $\text{RuCl}_3 \cdot n\text{H}_2\text{O}$  (20g/L) under stirring. The mixture was stirred for 30 minutes and subsequently heated at 160 °C by microwave for 5 minutes under nitrogen atmosphere. PtRu alloy nanoclusters were deposited on  $\text{Fe}_3\text{O}_4$  by treating 8 ml of PtRu alloy colloidal and 0.5 g of  $\text{Fe}_3\text{O}_4$  under hydrogen (3.0 MPa) in 20 ml of water at 150 °C for 2 h, and the obtained solid was washed with 150 ml of water and dried at 60

°C in a vacuum oven. PtRu/Fe<sub>3</sub>O<sub>4</sub> was subsequently converted to PtRu/FeCO<sub>3</sub> using the method for the preparation of Ru-Pt/FeCO<sub>3</sub>

### ***Catalyst characterizations.***

Transmission electron microscope (TEM) images were taken on an FEI Titan Cubed Themis G2 300 transmission electron microscope with an acceleration voltage of 200 kV. High-angle annular dark field (HAADF) and elemental distribution images were obtained using scanning transmission electron microscope (STEM) mode. To prepare the TEM samples, the catalysts were dispersed ultrasonically in ethanol for 30 minutes, and then a drop of suspension was placed and dried on a copper grid covered with a carbon film.

X-ray diffraction (XRD) patterns of the samples were measured on a Rigaku D/MAX-PC 2500 diffractometer with monochromatic Cu K $\alpha$  radiation ( $\lambda = 1.5406 \text{ \AA}$ ) at an accelerating potential of 40 kV and a tube current of 100 mA.

X-ray photoelectron spectroscopy (XPS) measurements of the samples were carried out with an Axis Ultra photoelectron spectrometer using an Al K $\alpha$  (1486.7 eV) X-ray source, with the pressure of the measuring chamber of  $5 \times 10^{-9}$  Torr. For the XPS measurement of Ru-Pt/FeCO<sub>3</sub>, the sample was reduced with a gas mixture of H<sub>2</sub> and He (H<sub>2</sub>/He=1/4) at 373 K for 1 hour in the sample treatment chamber, and then directly transferred to the measuring chamber. After reaction of H<sub>2</sub> with Ru-Pt/FeCO<sub>3</sub>, the solid was separated, washed with cyclohexane and water three times, and dried at 60 °C in a vacuum oven for XPS measurement. The obtained solid was subsequently treated with a mixture of CO<sub>2</sub> (1.25 MPa, 298 K) and H<sub>2</sub> (3.75 MPa, 298K) at 130 °C in a mixture of water (15 ml) and cyclohexane (15 ml) for 48 h, and the sample was collected for XPS measurement in the same way.

The Pt and Ru contents of catalysts were analyzed by an inductively coupled plasma atomic emission spectrometer (Leeman Corp.).

***Catalytic properties evaluation.***

In CTHC, 0.30 g of Ru-Pt/FeCO<sub>3</sub> or Ru-Pt/Fe<sup>13</sup>CO<sub>3</sub>, and 15 ml of water and 15 ml of cyclohexane were charged in a 50-ml autoclave. The autoclave was sealed and flushed with hydrogen three times to remove the air. Subsequently, 3.75 MPa of H<sub>2</sub> was introduced into the autoclave. The autoclave was heated to the reaction temperature, and the reaction was carried out under magnetic stirring (1200 rpm). After the reactions, the autoclave was cooled to room temperature with water, and the products were collected for analysis.

To measure the carbon balance of CTHC, the solid residue after reaction was recovered, washed and dried at 60 °C in a vacuum oven. The mass of carbon in the solid residue was measured by elemental analyzer (vario EL). The carbon consumed in CTHC could be obtained by the mass difference of carbon between catalyst and the solid residue, and mass of carbon in the products was measured by gas-chromatography (GC) (see below). Carbon balance was calculated based on the following equation:

$$\text{carbon balance} = \frac{\text{Mass of carbon in the products}}{\text{Mass of consumed carbon in CTHC}}$$

C-CTHC was conducted under the conditions applied in CTHC, except for the introduction of 1.25 MPa of CO<sub>2</sub> to the reaction system. C-CTHC was also conducted under H<sub>2</sub> pressure of 2.50 and 1.25 MPa, respectively.

C-CTHC was conducted in water (30 ml) without addition of cyclohexane under the same conditions as a comparison experiment.

In the experiments for testing the stability of Ru-Pt/FeCO<sub>3</sub> in C-CTHC at 130 °C, the catalyst was recovered by centrifugation, washed with water and cyclohexane three times, and used for a

new recycling test.

In the  $^{13}\text{C}$  isotope tracing experiments, 0.75 MPa of  $^{13}\text{C}$  labeled carbon dioxide (purity: 99%), 2.25 MPa of hydrogen, Ru-Pt/ $\text{FeCO}_3$ , and 15 ml of cyclohexane (or 15 ml of water and 15 ml of cyclohexane) were charged in a 50-ml autoclave, and C-CTHC were conducted at 130 °C.

In the control experiments, Ru/ $\text{FeCO}_3$ , Pt/ $\text{FeCO}_3$ , Ru-Pt/ $\text{FeCO}_3$ , PtRu/ $\text{FeCO}_3$ , Ru-Pt/ $\text{TiO}_2$ , or Ru-Pt/ $\text{Fe}_3\text{O}_4$ ,  $\text{CO}_2$  and  $\text{H}_2$  were charged in a 50-ml autoclave, and the reactions were conducted in a mixture of water (15 ml) and cyclohexane (15 ml) over the five catalysts at 130 °C for 8 hours, respectively.

Products were identified using gas chromatography (GC) by comparison with authentic samples and gas chromatography-mass spectrometer (GC-MS). The gas mixture was collected with a gas container and analyzed by a GC (Shimadzu GC-2010). The analysis of hydrocarbons in gas mixture was conducted with an HP-PLOT Q capillary column ( $\phi$  0.53 mm  $\times$  30 m) and a flame-ionization (FID) detector. The concentration of  $\text{CH}_4$  was analyzed using external normalization method. Each concentration of  $\text{C}_2^+$  hydrocarbons was quantified by comparing with the  $\text{CH}_4$  peak area using response factor. CO was analyzed by a CarboPLOT P7 capillary column ( $\phi$  0.53 mm  $\times$  25 m) and a thermal conductivity detector (TCD).

The analysis of hydrocarbons in cyclohexane was conducted with an Rtx-5MS capillary column ( $\phi$  0.25 mm  $\times$  60 m) and a FID detector. The concentration of decane was quantified using external normalization method. Each concentration of hydrocarbons in cyclohexane was quantified by comparing with the peak area of decane using response factor as followed:

$$m_{\text{decane}} = CVM$$

$$\frac{m_x}{m_{\text{decane}}} = \frac{A_x f_x}{A_{\text{decane}} f_{\text{decane}}}$$

$$n_x = \frac{m_x}{M_x}$$

where  $C$  is the measured concentration of decane;  $V$  is the volume of cyclohexane;  $M$  is the molar mass of decane;  $f_x$  is the response factor of hydrocarbon;  $A_x$  is the measured peak area of hydrocarbon; and  $n_x$  is the mole of hydrocarbon.

The alcohols in water were analyzed using an HP-INNOWAX capillary column ( $\phi$  0.32 mm  $\times$  30 m) and an FID detector. The concentration of ethanol in water was quantified using external normalization method, and other alcohols were quantified using the methods applied in hydrocarbon quantification.

The amount of  $\text{CO}_2$  charged in the autoclave was calculated according to the actual gas equation of state using compressibility factor. The conversions of carbon in the substrates (including  $\text{CO}_2$  and  $\text{FeCO}_3$ ) in reactions were calculated based on the following equation:

$$\text{Conversion} = \frac{\sum_{i=1}^n i \times \text{mole of } Ci \text{ hydrocarbon} + \sum_{i=1}^n i \times \text{mole of } Ci \text{ alcohol}}{\text{mole of carbon in the substrates}} \times 100\%$$

The selectivity for hydrocarbons and alcohols was calculated according to the following equation:

$$\text{Sel}(Ci) = \frac{i \times \text{mole of } Ci \text{ hydrocarbon (or alcohol)}}{\sum_{i=1}^n i \times \text{mole of } Ci \text{ hydrocarbon} + \sum_{i=1}^n i \times \text{mole of } Ci \text{ alcohol}} \times 100\%$$

The mass spectra of produced hydrocarbons in isotope tracer experiments were measured by GC-MS coupling (Shimadzu GCMS-QP2010).

**Fig.S1** X-ray diffraction patterns of Ru-Pt/FeCO<sub>3</sub> and FeCO<sub>3</sub> (PDF # 29-0696).

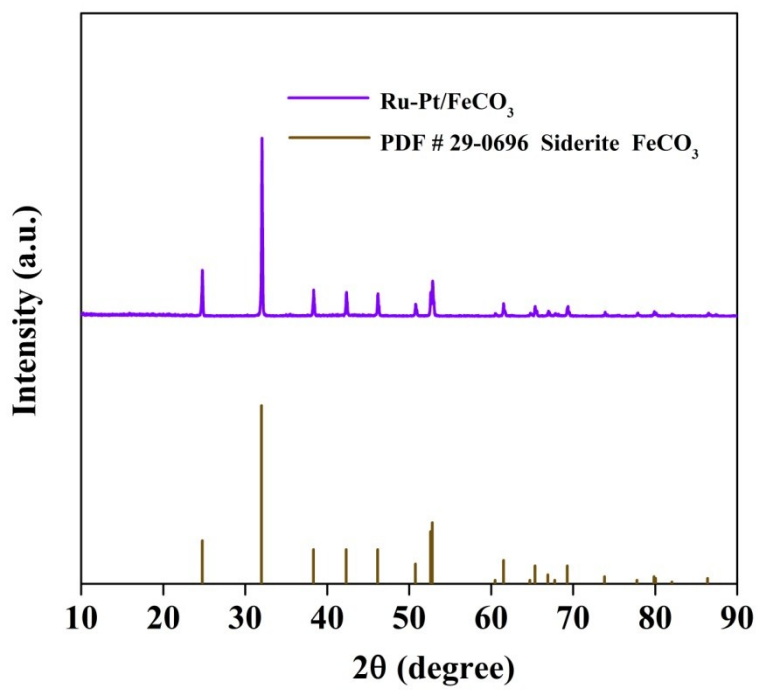



**Fig. S2** High resolution transmission electron microscope (HRTEM) image of Ru-Pt/FeCO<sub>3</sub> (A) and metal particle size distribution (B).

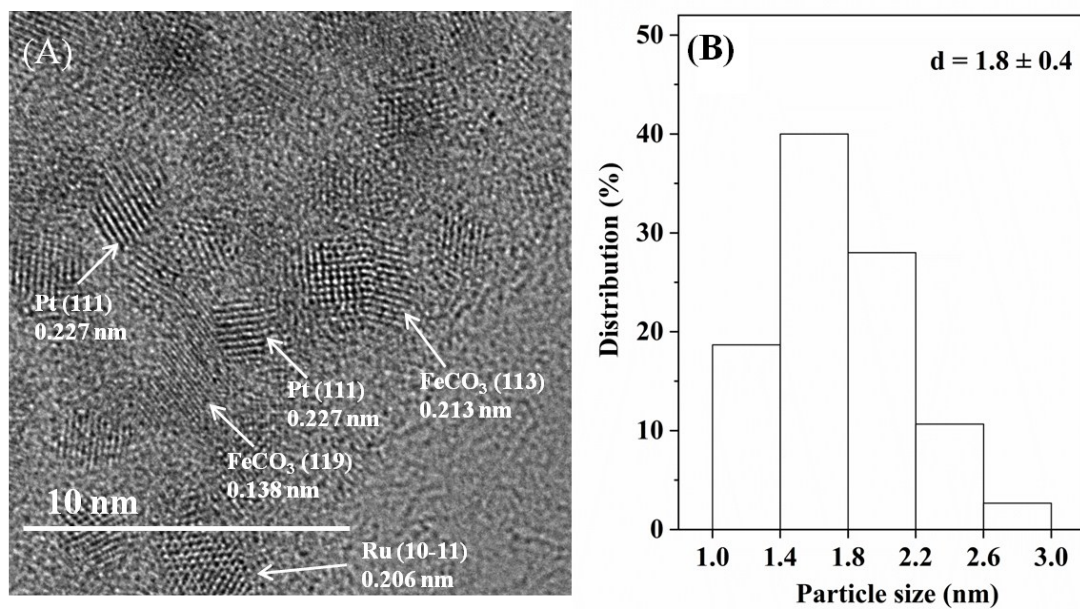

**Fig. S3** X-ray photoelectron spectroscopy (XPS) spectra of Ru (A), Pt (B), O (C), and Fe (D) in Ru-Pt/FeCO<sub>3</sub>. The binding energy scales for the samples were referenced by setting the C 1s binding energy of contamination carbon to 284.8 eV.

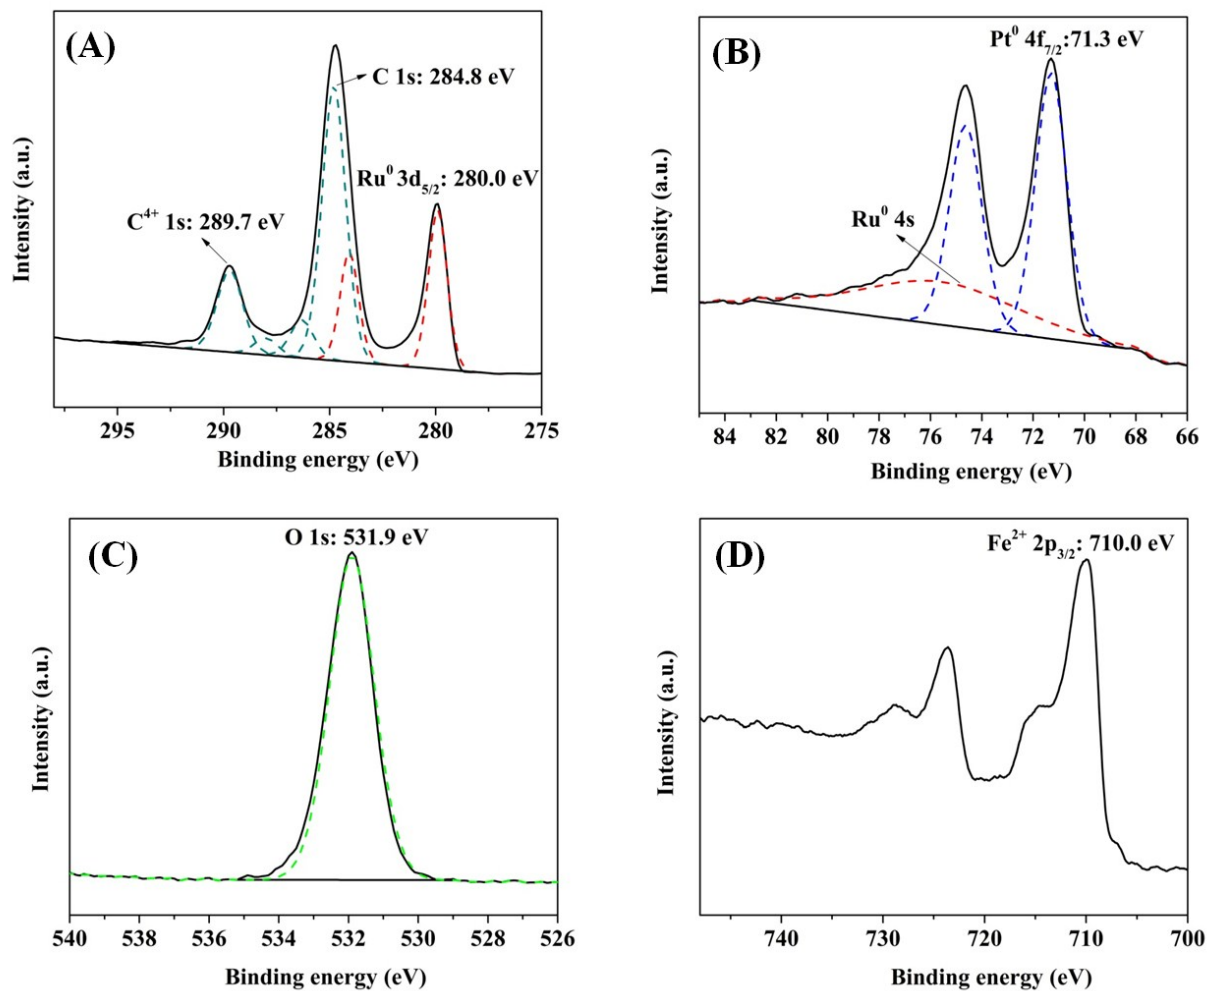

**Fig. S4** Mass spectrum of pentane produced in the reaction of  $\text{H}_2$  with  $\text{Ru-Pt/Fe}^{12}\text{CO}_3$  (A), and in the reaction of  $\text{Ru-Pt/Fe}^{12}\text{CO}_3$  with  $\text{H}_2$  under an atmosphere of  $^{13}\text{CO}_2$  (B) at 130 °C in cyclohexane, respectively.

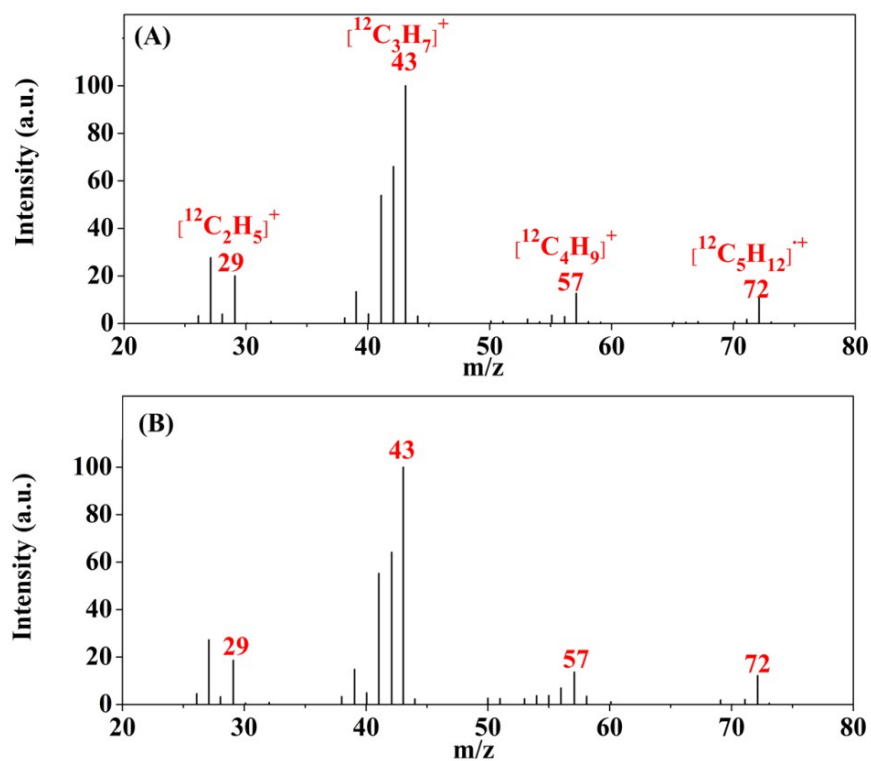

**Fig. S5** XPS spectra of Fe 2p in Ru-Pt/FeCO<sub>3</sub> (A), the recovered sample after treating Ru-Pt/FeCO<sub>3</sub> with H<sub>2</sub> (B), and the sample obtained by treating the recovered sample with H<sub>2</sub> and CO<sub>2</sub> (C).

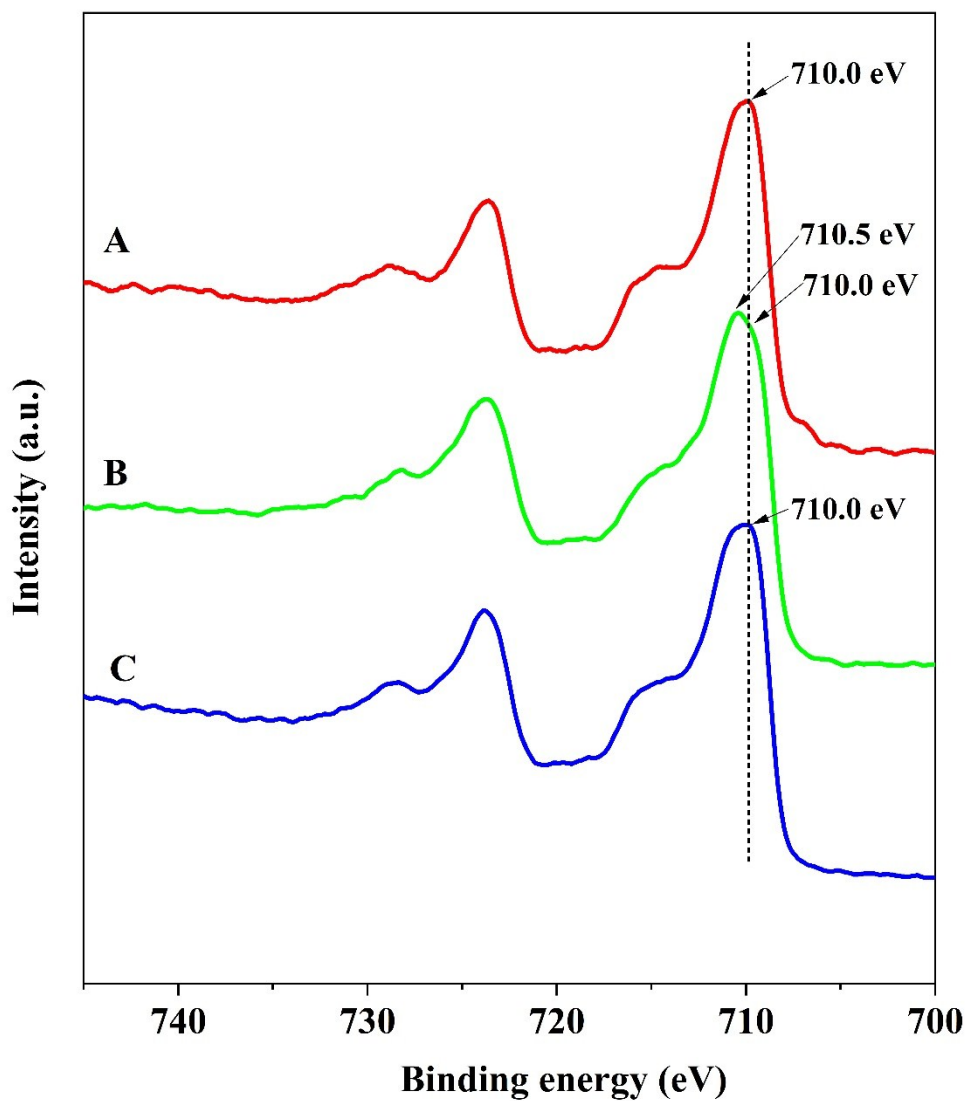

**Fig. S6** GC spectra of C<sub>3</sub><sup>+</sup> hydrocarbons produced in CTHC (A) and C-CTHC (B) at 130 °C.

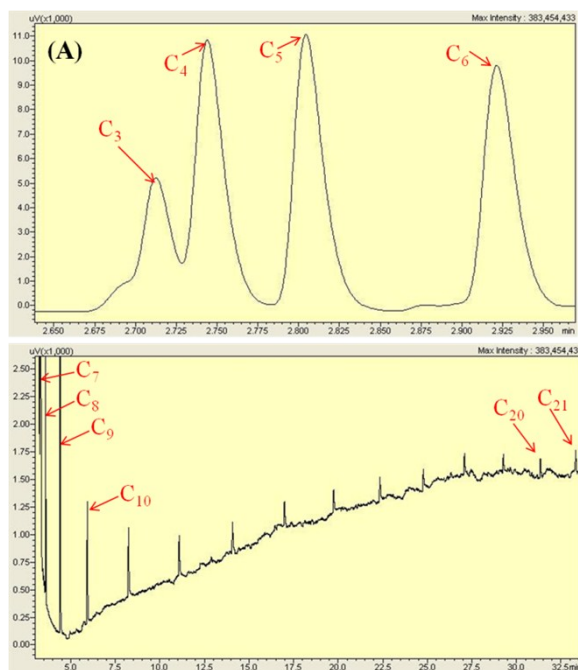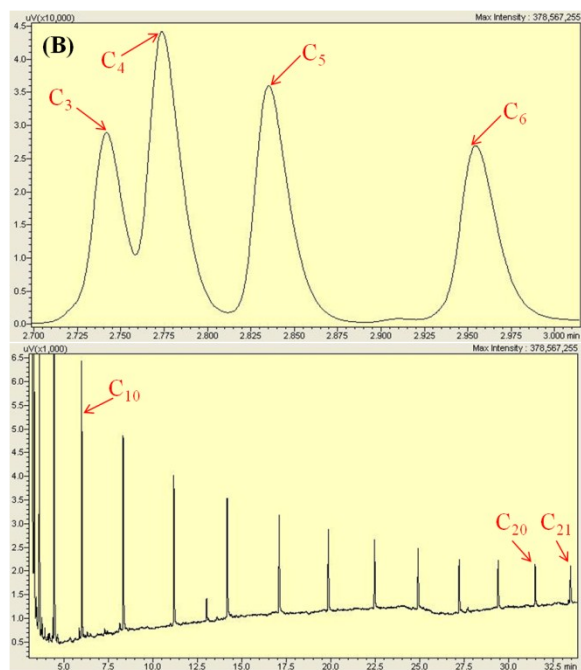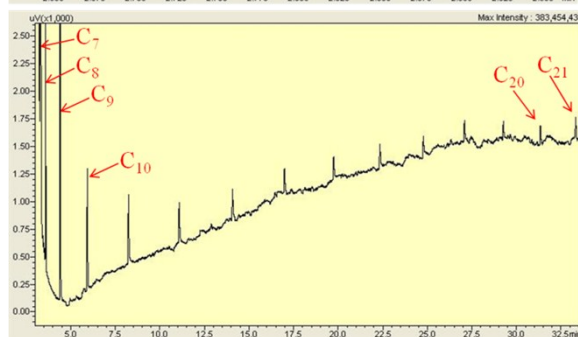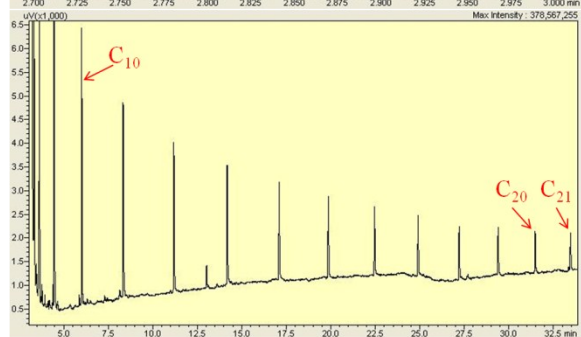

**Fig. S7** Distribution of the formed hydrocarbons in C-CTHC at 130 °C.

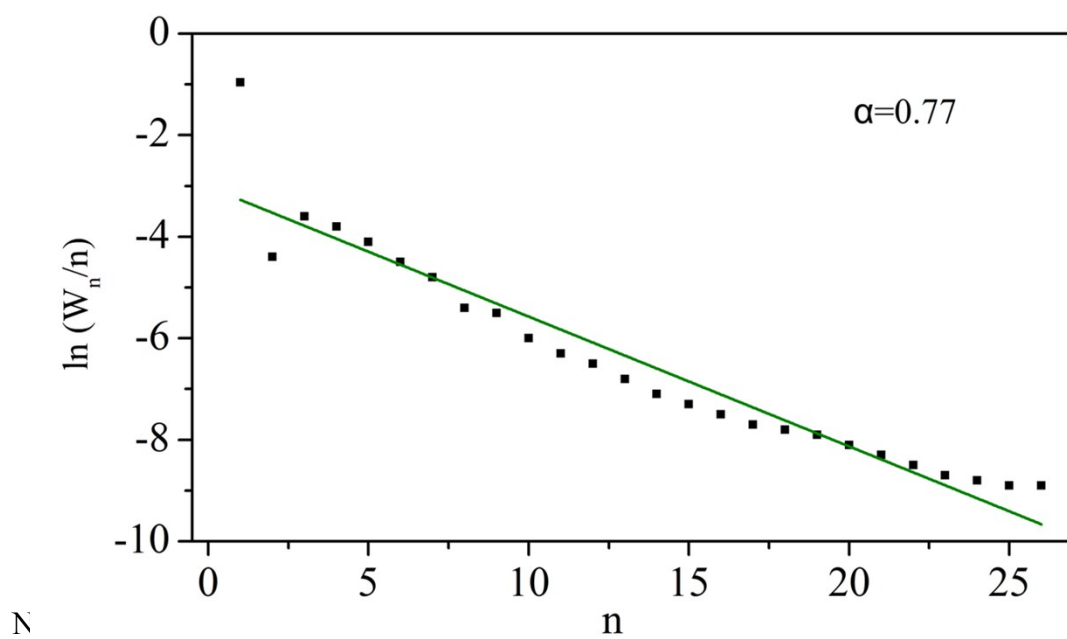

**Fig. S8** X-ray diffraction (XRD) patterns of Ru/FeCO<sub>3</sub> and Pt/FeCO<sub>3</sub>.

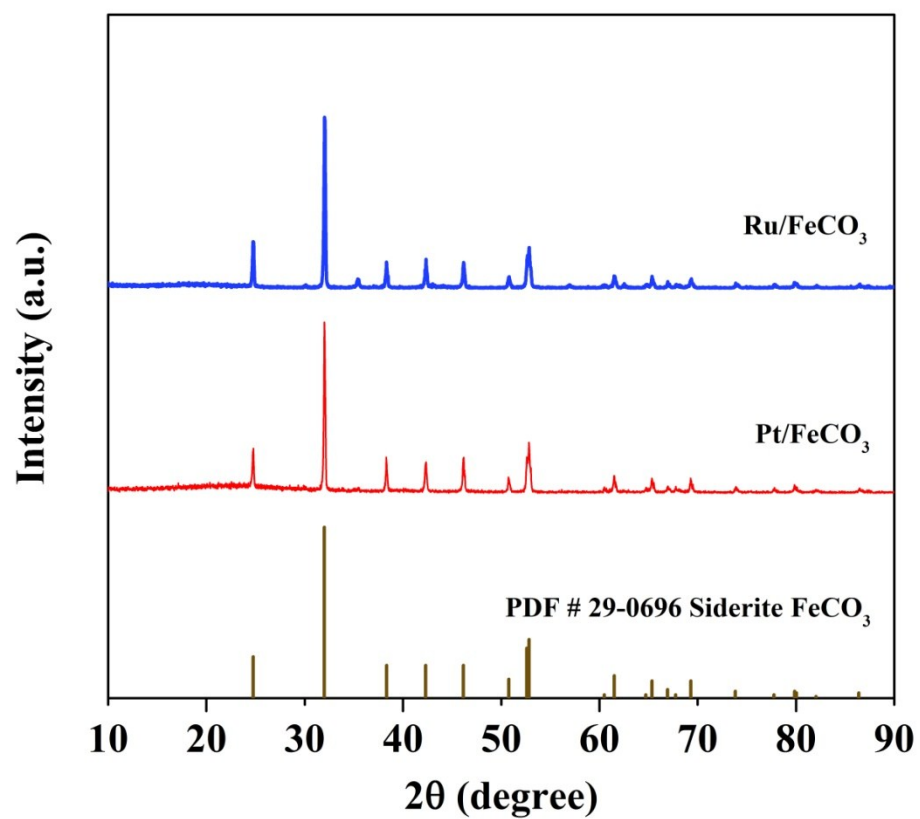

**Fig. S9** The stability of Ru-Pt/FeCO<sub>3</sub> in catalyzing C-CTHC. Reaction conditions: Ru-Pt/FeCO<sub>3</sub>, 0.3 g; water, 15 ml; cyclohexane, 15 ml; CO<sub>2</sub>, 1.25 MPa; H<sub>2</sub>, 3.75 MPa; time, 8 h. The triangle in the graph denotes the conversion of carbon in the substrates (including FeCO<sub>3</sub> and CO<sub>2</sub>).

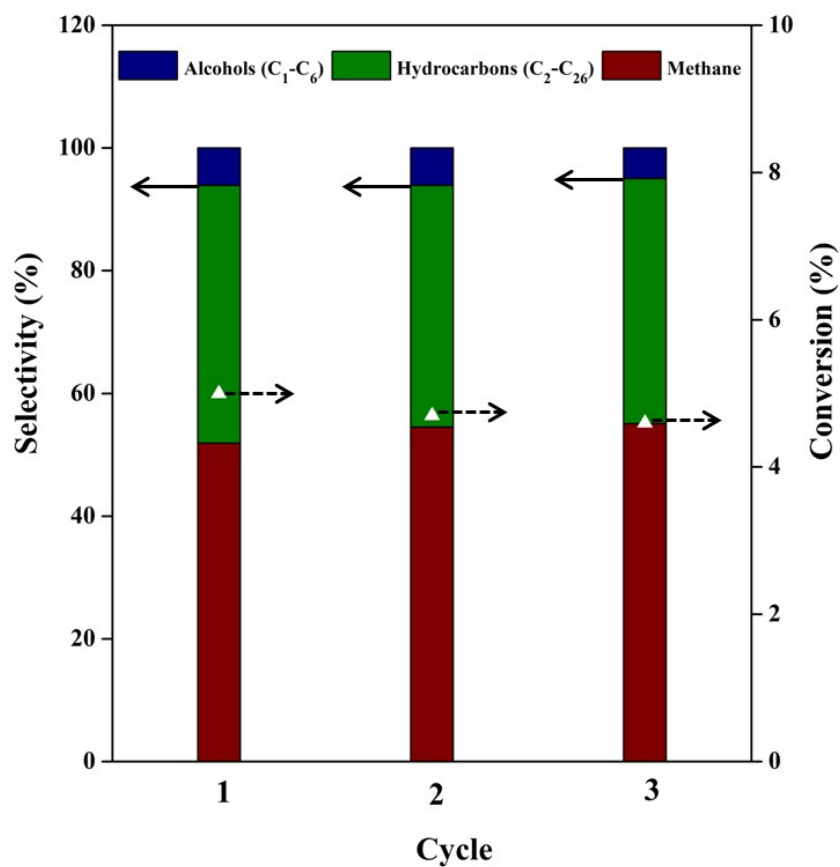

**Table S1** Catalytic properties for C-CTHC over Ru-Pt/FeCO<sub>3</sub> under different H<sub>2</sub> pressures.



| $P_{H_2}$<br>(MPa) | Selectivity <sup>[a]</sup> |              |              |                    | Time-yield for $C_2^+$<br>hydrocarbons <sup>[a]</sup> |
|--------------------|----------------------------|--------------|--------------|--------------------|-------------------------------------------------------|
|                    | $CH_4$                     | $C_2^{+[b]}$ | $C_5^{+[b]}$ | ROH <sup>[b]</sup> |                                                       |
| 1.25               | 25.1                       | 68.1         | 51.3         | 6.8                | 109.2                                                 |
| 2.50               | 38.2                       | 55.6         | 41.0         | 6.2                | 292.6                                                 |
| 3.75               | 51.8                       | 42.1         | 26.1         | 6.1                | 387.1                                                 |

Reaction conditions: Pt-Ru/FeCO<sub>3</sub>, 0.30 g; water, 15 ml; cyclohexane, 15 ml; CO<sub>2</sub>, 1.25 MPa; time, 8 h. <sup>[a]</sup> Selectivity (%) and time-yield (mmol·mol<sub>metal</sub><sup>-1</sup>·h<sup>-1</sup>) were calculated based on moles of carbon. <sup>[b]</sup>  $C_2^+$  and  $C_5^+$  denote hydrocarbons with carbon number larger than 2 and 5. ROH denotes multi-carbon alcohols.

**Table S2** Catalytic properties for C-CTHC over Ru/FeCO<sub>3</sub>, Pt/FeCO<sub>3</sub>, Ru-Pt/FeCO<sub>3</sub>, and PtRu/FeCO<sub>3</sub>, respectively.

| Cat                                    | Selectivity <sup>[a]</sup> |                                | Time-yield of hydrocarbons <sup>[a]</sup> |     |
|----------------------------------------|----------------------------|--------------------------------|-------------------------------------------|-----|
|                                        | Hydrocarbon                |                                | Alcohol                                   |     |
|                                        | C <sub>1</sub>             | C <sub>2</sub> <sup>+[c]</sup> |                                           |     |
| Ru/FeCO <sub>3</sub>                   | 91.6                       | 4.5                            | 3.9                                       | 766 |
| Pt/FeCO <sub>3</sub>                   | 26.1                       | 49.6                           | 24.3                                      | 175 |
| Ru-Pt/FeCO <sub>3</sub> <sup>[b]</sup> | 51.8                       | 42.1                           | 6.1                                       | 863 |
| PtRu/FeCO <sub>3</sub> <sup>[b]</sup>  | 34.1                       | 36.2                           | 29.7                                      | 80  |

Reaction conditions: temperature, 130 °C; CO<sub>2</sub>, 1.25 MPa; H<sub>2</sub>, 3.75 MPa; reaction time, 8 h; cyclohexane, 15 ml; water, 15 ml; catalyst, 0.3 g. <sup>[a]</sup>Selectivity (%) and time-yield of hydrocarbons (mmol<sub>CH<sub>2</sub></sub>/mol<sub>metal</sub>/h) were calculated based on moles of carbon. <sup>[b]</sup>Ru-Pt/FeCO<sub>3</sub> denotes FeCO<sub>3</sub> supported Ru and Pt nanoclusters, and PtRu/FeCO<sub>3</sub> denotes FeCO<sub>3</sub> supported PtRu alloy nanoclusters. <sup>[c]</sup>Hydrocarbons produced over Ru/FeCO<sub>3</sub>, Pt/FeCO<sub>3</sub>, and PtRu/FeCO<sub>3</sub> were C<sub>1</sub>-C<sub>10</sub>, C<sub>1</sub>-C<sub>14</sub>, and C<sub>1</sub>-C<sub>11</sub> hydrocarbons, respectively, while those produced over Ru-Pt/FeCO<sub>3</sub> were C<sub>1</sub>-C<sub>26</sub> hydrocarbons.

**Table S3** Catalytic property for reaction of CO<sub>2</sub> with H<sub>2</sub> over Ru-Pt/TiO<sub>2</sub>.

| Temperature | Selectivity <sup>[a]</sup> | Conversion (%) |
|-------------|----------------------------|----------------|
|-------------|----------------------------|----------------|

| (°C) | Hydrocarbon    |                                | Alcohol                        |      |
|------|----------------|--------------------------------|--------------------------------|------|
|      | C <sub>1</sub> | C <sub>2</sub> -C <sub>4</sub> | C <sub>1</sub> -C <sub>2</sub> |      |
|      |                |                                |                                |      |
| 130  | 97.9           | 1.2                            | 0.9                            | 29.5 |

Reaction conditions: CO<sub>2</sub>, 1.25 MPa; H<sub>2</sub>, 3.75 MPa; time, 8 h; cyclohexane, 15 ml; water, 15 ml; catalyst, 0.2 g.

**Table S4** Catalytic property for C-CTHC over Ru-Pt/FeCO<sub>3</sub> in water.

| Temperature<br>(°C) | Selectivity <sup>[a]</sup> |                                |                                | Conversion (%) |
|---------------------|----------------------------|--------------------------------|--------------------------------|----------------|
|                     | Hydrocarbon                |                                | Alcohol                        |                |
|                     | C <sub>1</sub>             | C <sub>2</sub> -C <sub>7</sub> | C <sub>1</sub> -C <sub>7</sub> |                |
| 130                 | 63.7                       | 30.4                           | 5.9                            | 4.9            |

Reaction conditions: CO<sub>2</sub>, 1.25 MPa; H<sub>2</sub>, 3.75 MPa; time, 8 h; water, 30 ml; catalyst, 0.3 g.

## References

- [1] Y. Wang, J. W. Ren, K. Deng, L. L. Gui, Y. Q. Tang, *Chem. Mater.* 2000, **12**, 1622-1627.
- [2] L. S. Zhong, J. S. Hu, H. P. Liang, A. M. Cao, W. G. Song, L. J. Wan, *Adv. Mater.* 2006, **18**, 2426-2431.
- [3] L. W. Zhang, A. Gao, Y. Liu, Y. Wang, J. T. Ma, *Electrochim. Acta* 2014, **132**, 416-422.
